# Supplementary material for: Infrared multiple photon dissociation spectroscopy and density functional theory (DFT) studies of protonated permethylated β-cyclodextrin–water non-covalent complexes
Source: Royal Society of Chemistry journal article supplement (doi:10.1039/c3cp54841d), 2014-01-01
Supplement: c3cp54841d1.pdf [file c3cp54841d1.pdf]

## Supporting Information

### Infrared Multiple Photon Dissociation Spectroscopy and Density Functional Theory (DFT) Studies of Protonated Permethylated $\beta$ -Cyclodextrin-Water Noncovalent Complexes

Sung-Sik Lee,<sup>[a]†</sup> Soojin Park,<sup>[b]†</sup> Ju-Young Kim,<sup>[a]</sup> Hye-Rim Kim,<sup>[a]</sup> Sungyul Lee\*<sup>[a]</sup> and Han Bin Oh\*<sup>[b]</sup>

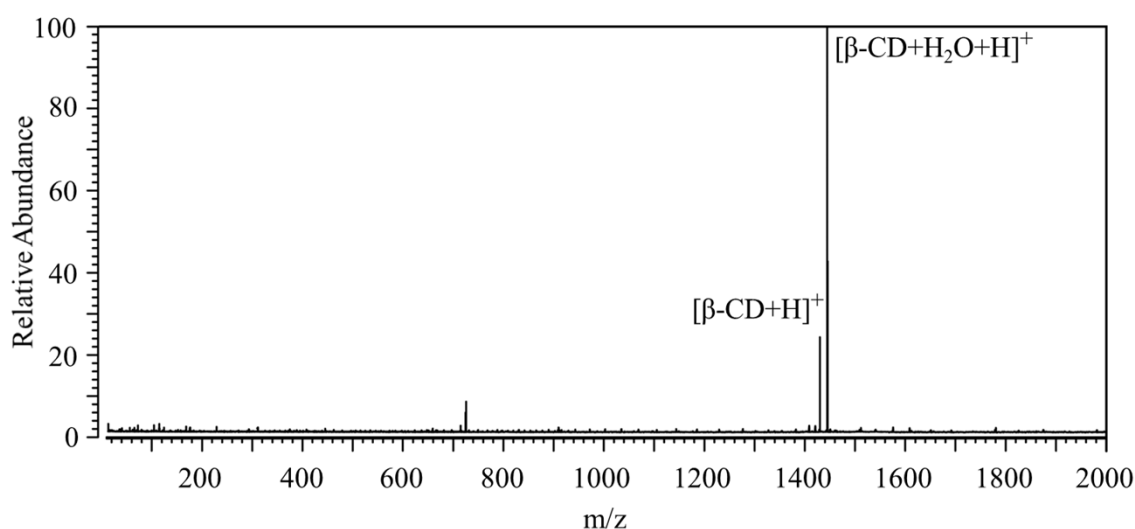

**Figure S1.** ESI-MS spectrum showing the abundant formation of protonated permethylated  $\beta$ -cyclodextrin-water non-covalent complexes.

**Table S1.** Electronic energies, zero-point energies, relative electronic energies, and relative Gibbs free energies at 298 K of two permethylated  $\beta$ -CD conformers.

|                     | $E$<br>(Hartree) | ZPE<br>(kcal/mol) | $\Delta E$<br>(kcal/mol) | $\Delta G_{298K}$<br>(kcal/mol) |
|---------------------|------------------|-------------------|--------------------------|---------------------------------|
| <b>Conformer I</b>  | -5098.95478      | 1131.19           | 0                        | 0                               |
| <b>Conformer II</b> | -5098.93754      | 1130.81           | 10.82                    | 12.21                           |
